# Supplementary material for: Sequence, structure and functional diversity of PD-(D/E)XK phosphodiesterase superfamily
Source: PubMed Central journal article supplement — Nucleic Acids Res. 2012 May 24;40(15):7016–45. doi: 10.1093/nar/gks382 (PMC3424549; doi:10.1093/nar/gks382), 2012-05-24

Group 3

78778033

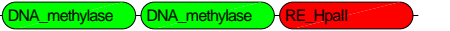

291530358

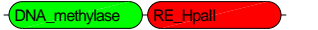

Group 5

15020665

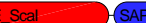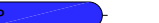

Group 7

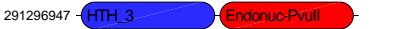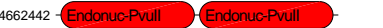

Group 9

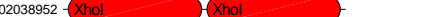

Group 14

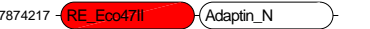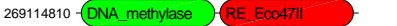

Group 15

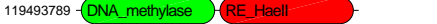

Group 17

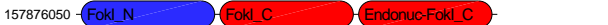

Group 31

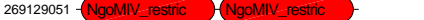



Group 33

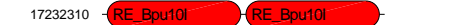

Group 34

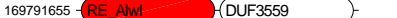

Group 35

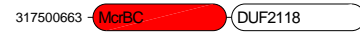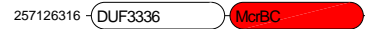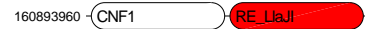

Group 36

123442098 - Eco57I

BsuBI\_PstI\_RE

307152624 - DNA\_methylase

DNA\_methylase

BsuBI\_PstI\_RE

Group 37

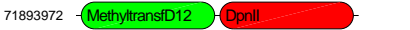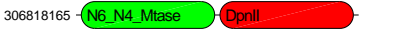

Group 38

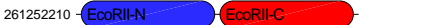

Group 40

119357711

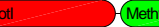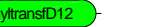

78189693

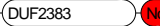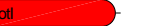

Group 42

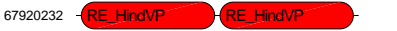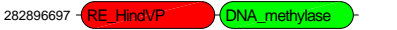



Group 46

261379137

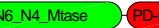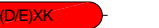

N6\_N4\_Mtase

PD-(D/E)XK

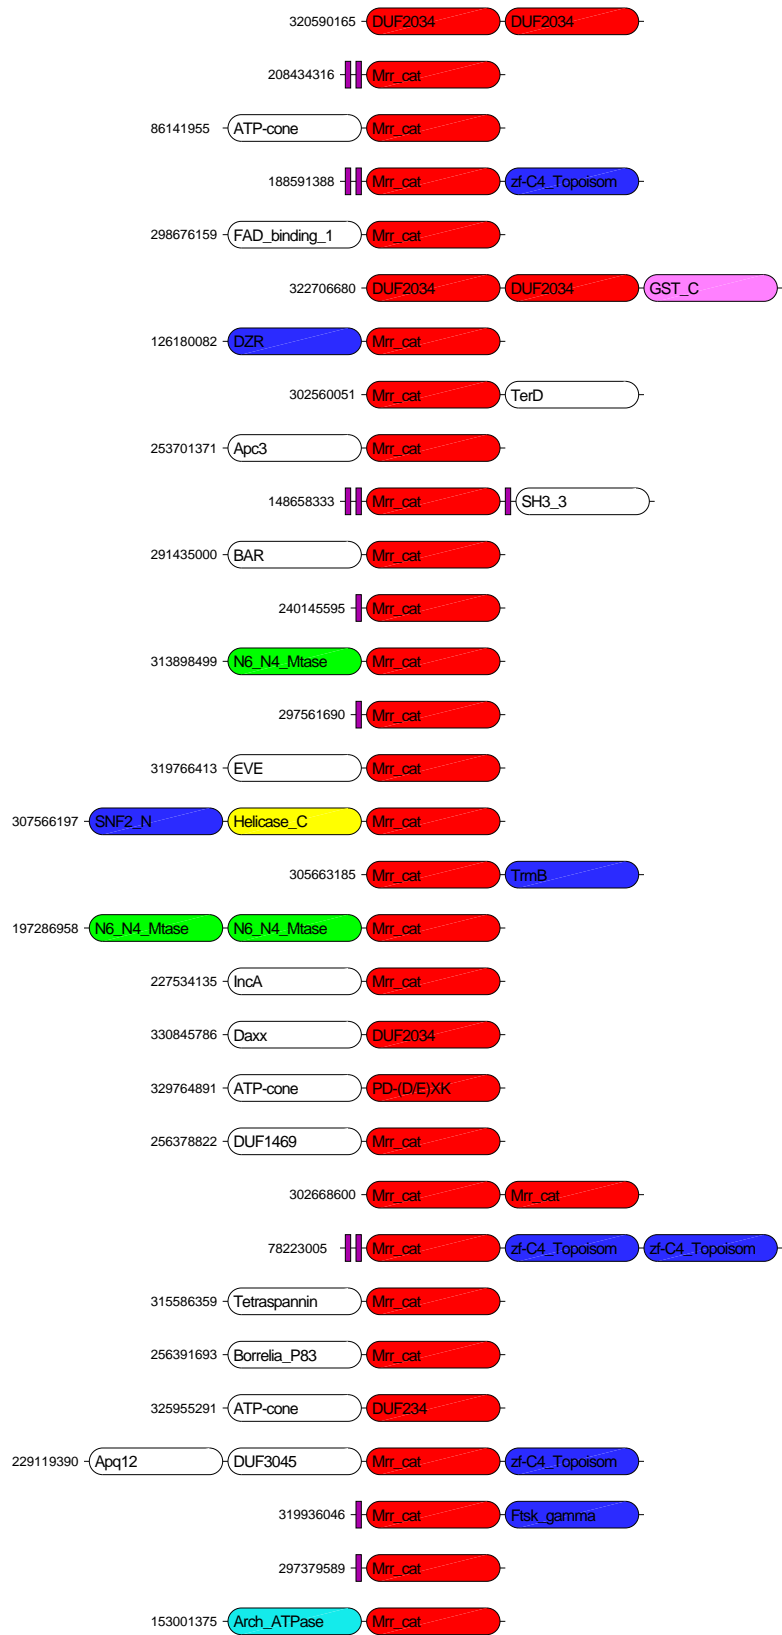

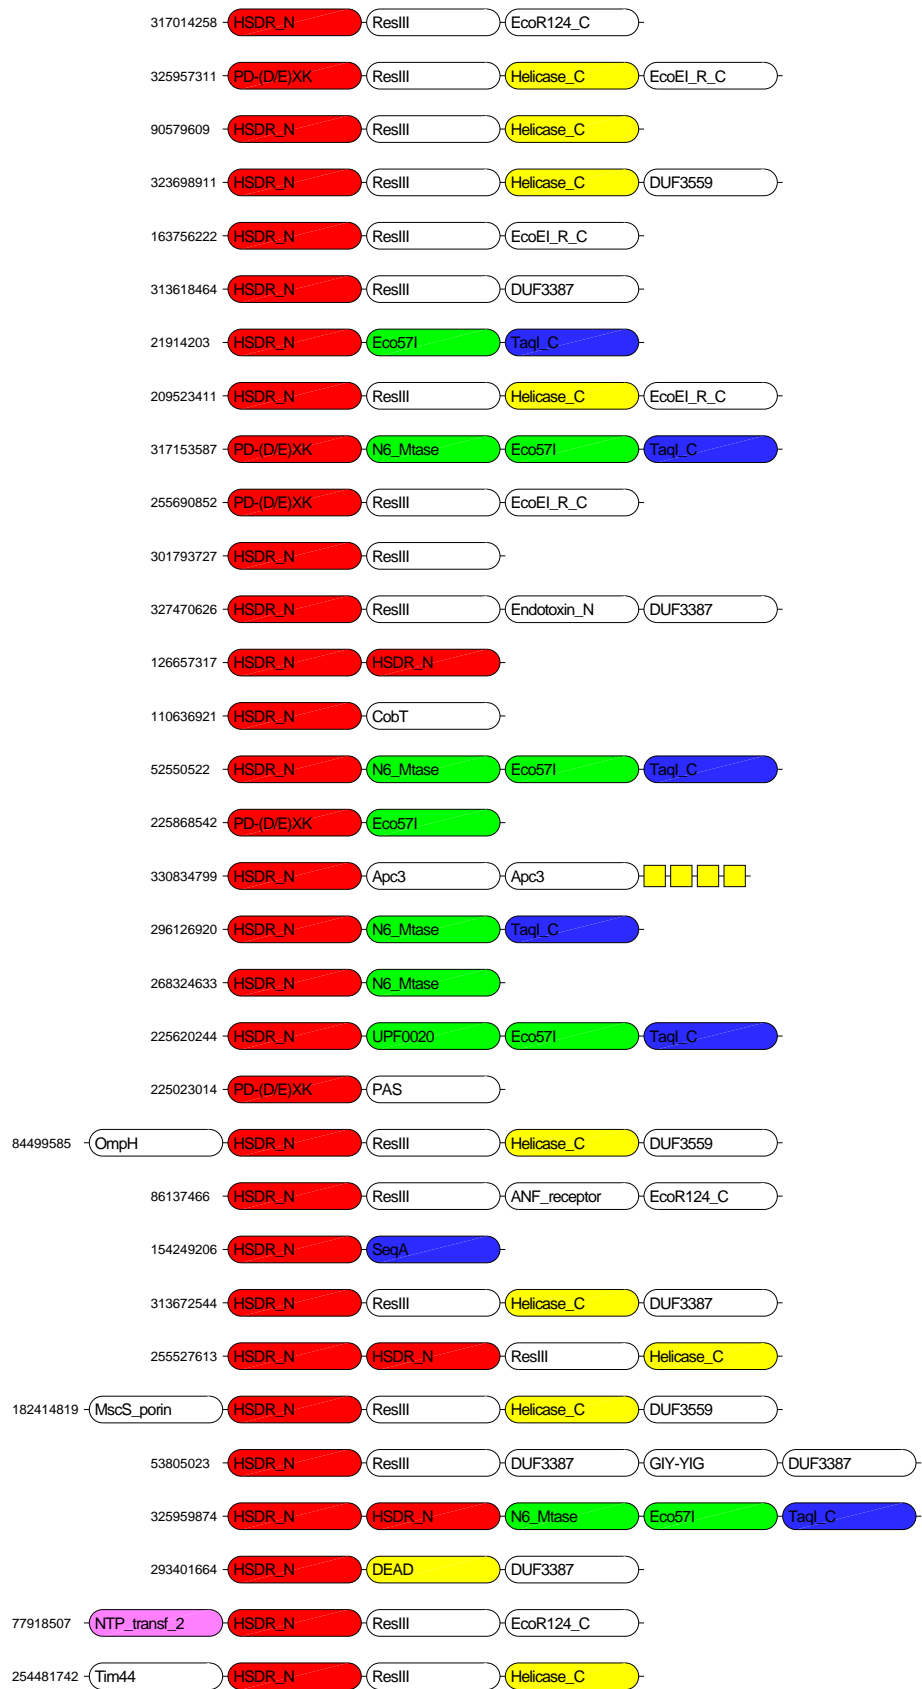

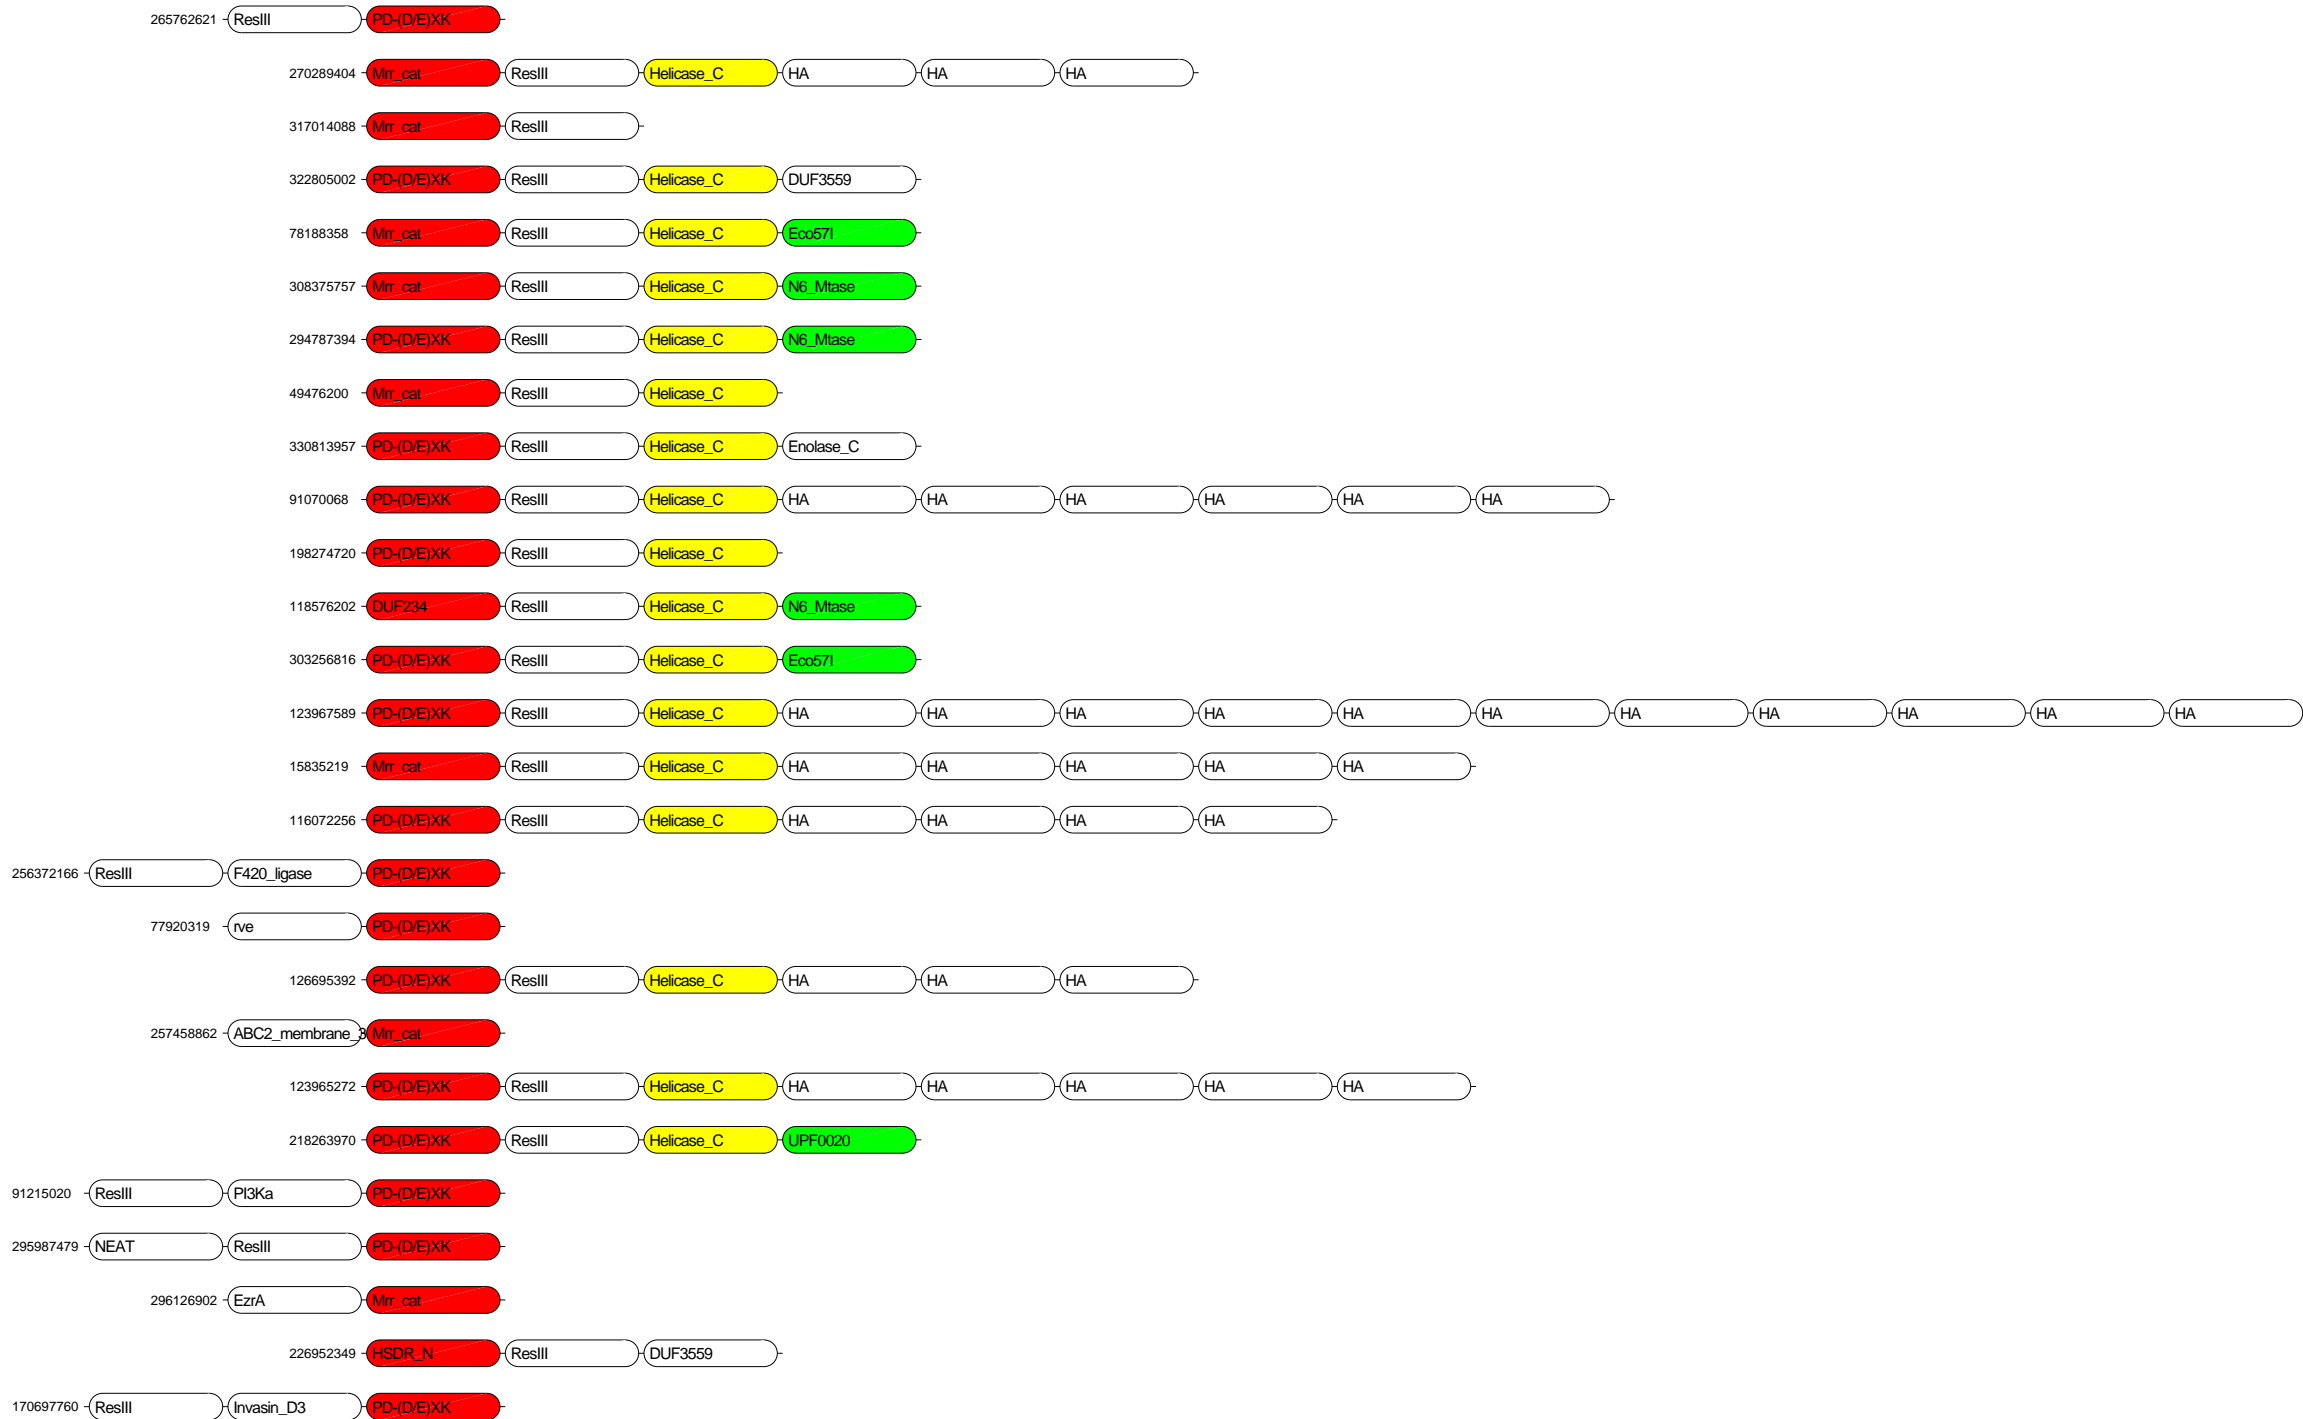

Group 51

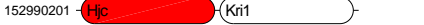

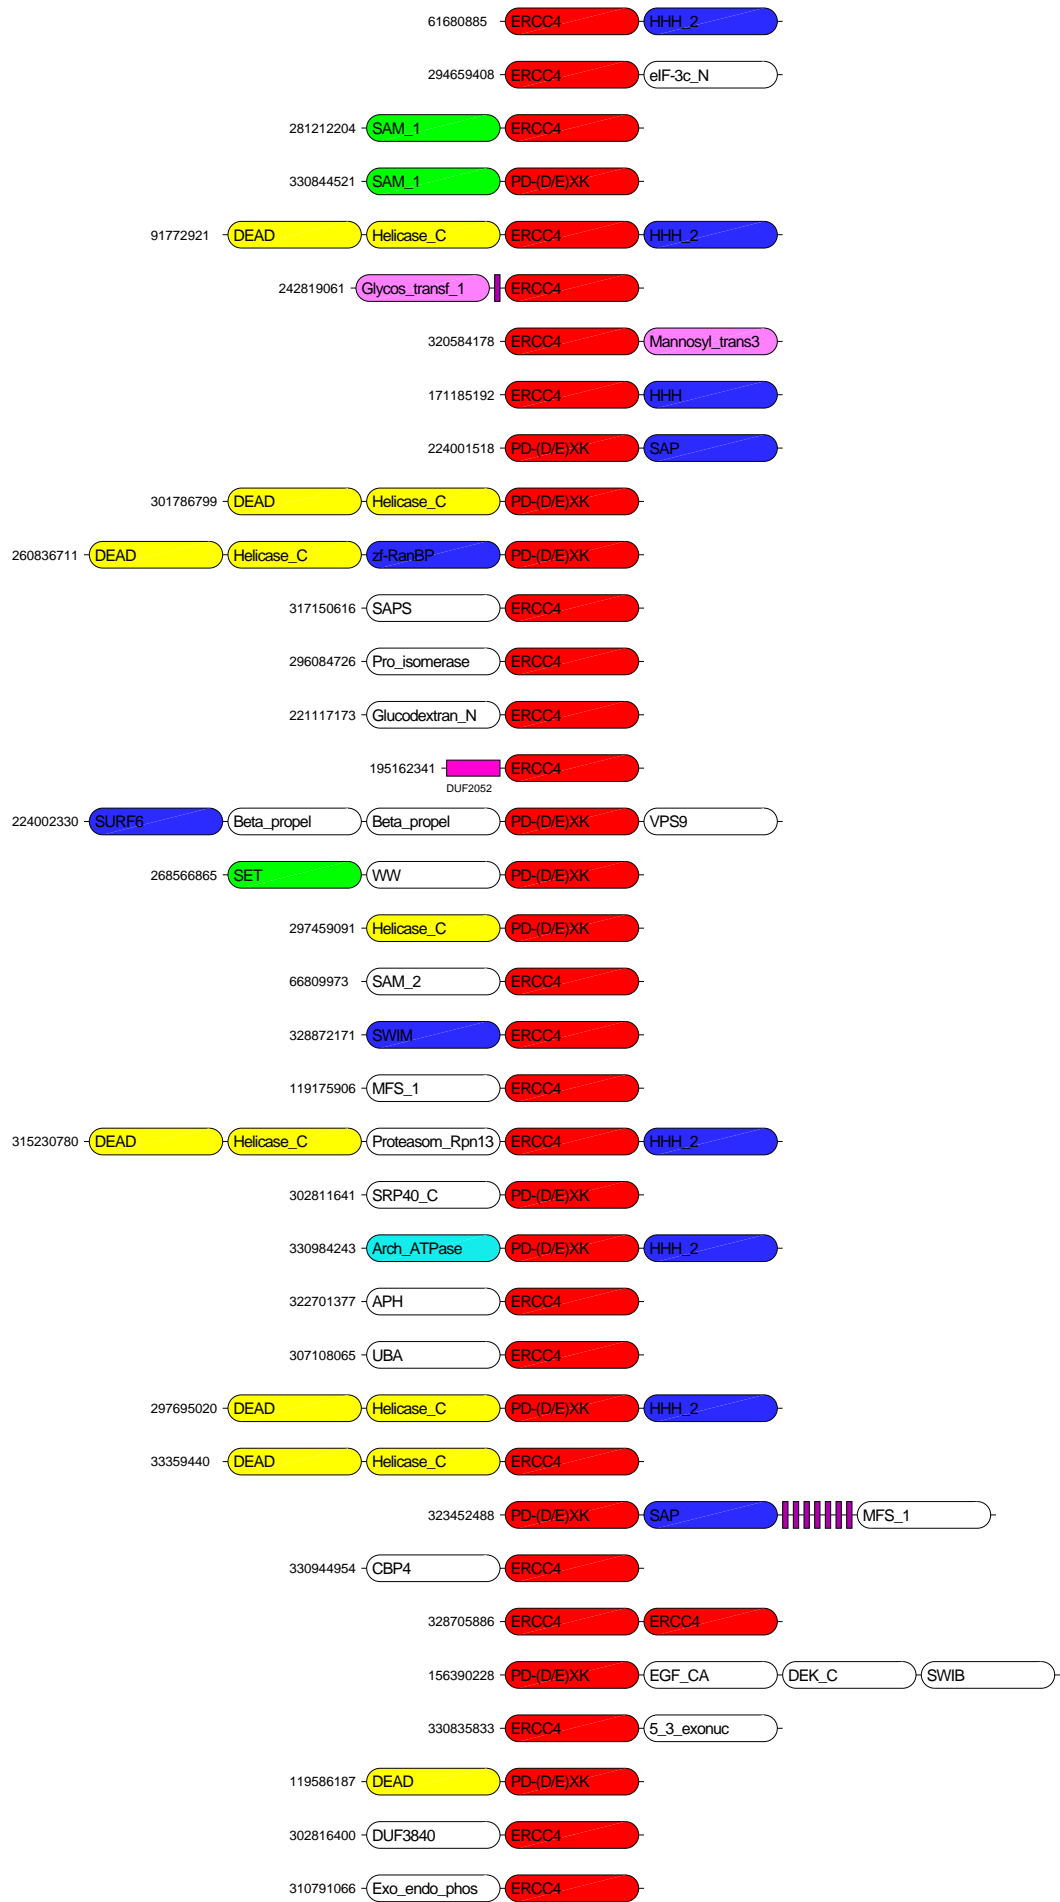

Group 53

309775703

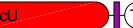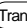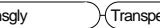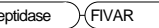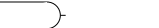

Group 54

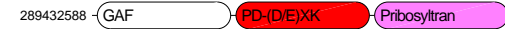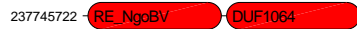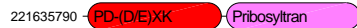



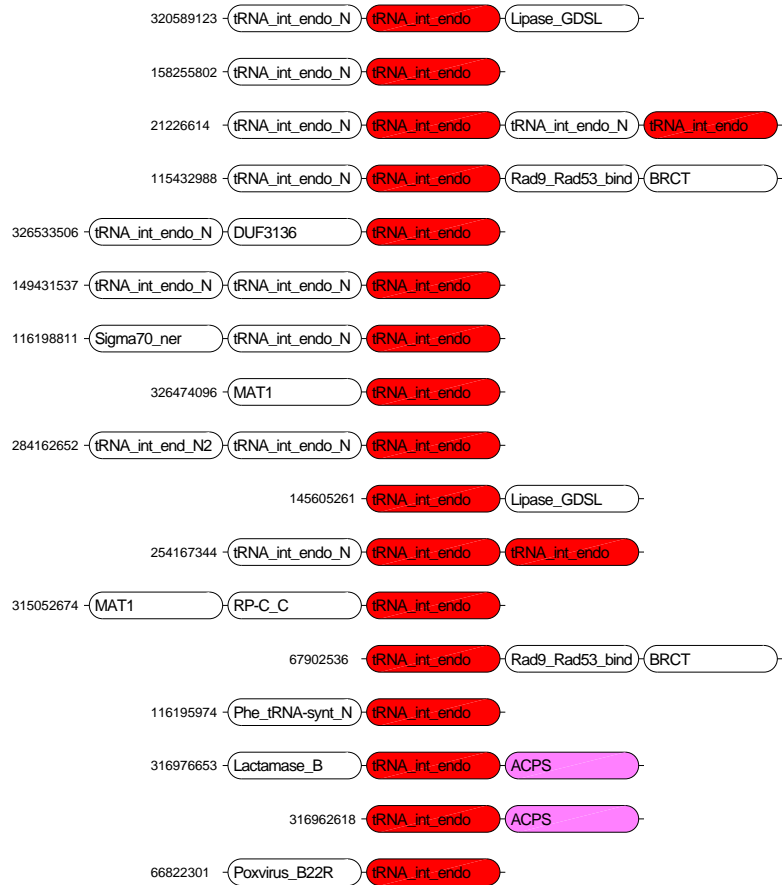

Group 56

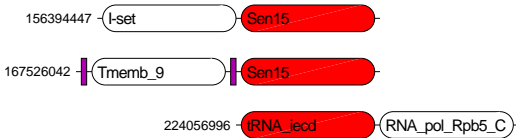

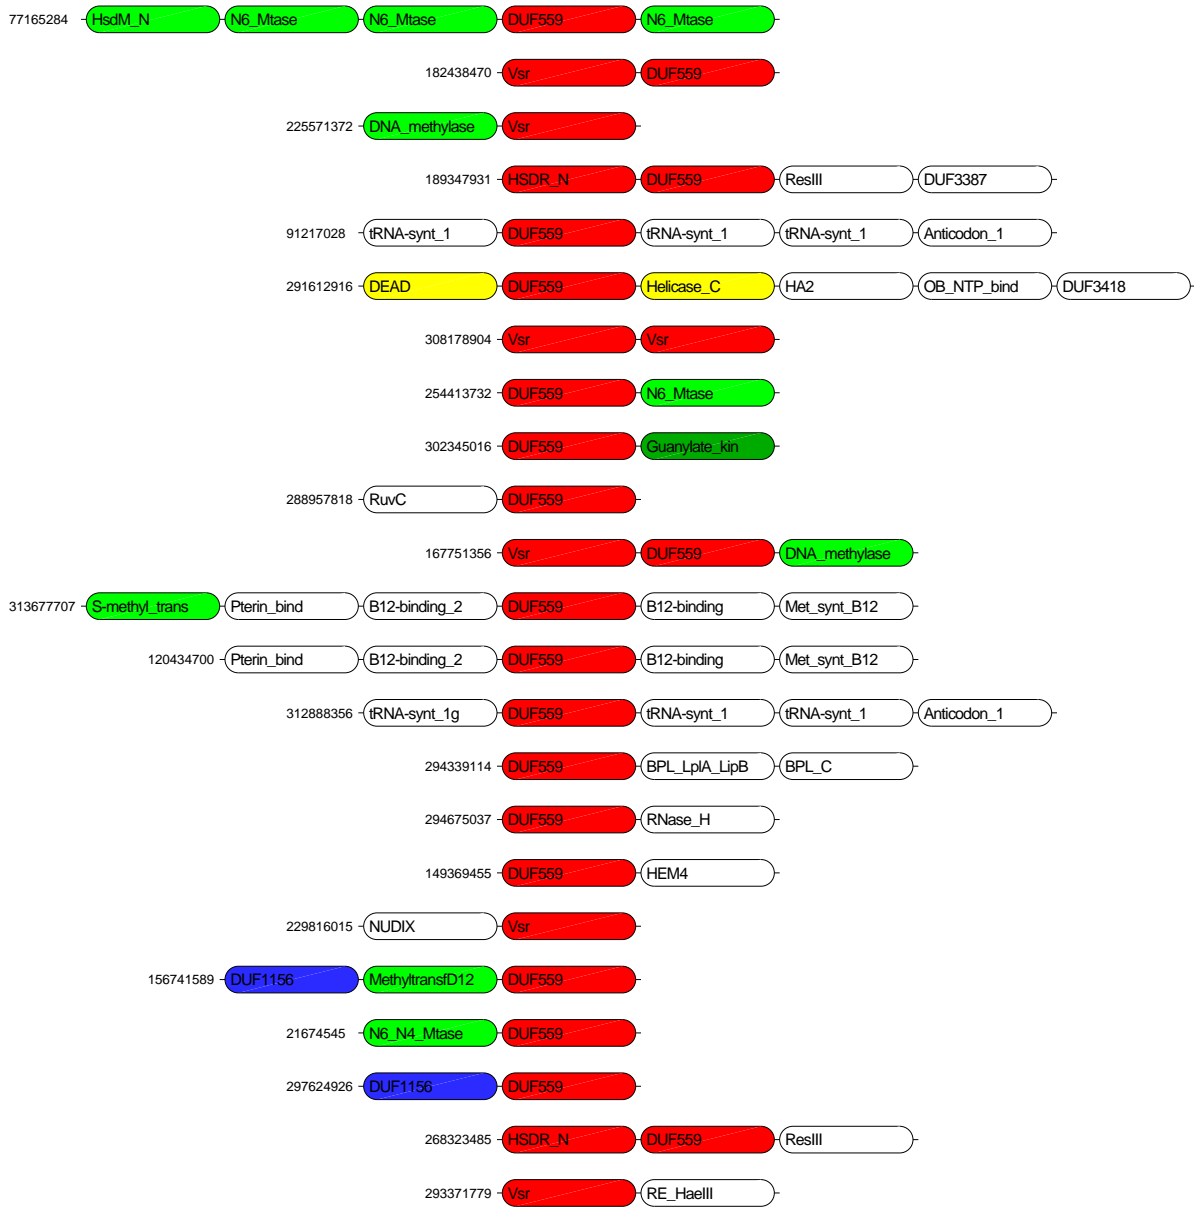

Group 59

71734882 - Tn7\_Tnp\_TnsA\_N - Tn7\_Tnp\_TnsA\_C

186473763 - PD-(D/E)XK - Tn7\_Tnp\_TnsA\_C

323516280 - Tn7\_Tnp\_TnsA\_N - Mg\_chelatase

126651702 - Tn7\_Tnp\_TnsA\_N - DUF742

Group 60

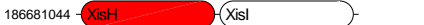

148360825 - PD-(D/E)XK - cobW

108800933 - PD-(D/E)XK - DUF699

323451003 - PD-(D/E)XK - Viral\_helicase1

14520327 - PDDEXK\_1 - DEAD

218247654 - PD-(D/E)XK - DUF2779

86740240 - PD-(D/E)XK - IstB\_IS21 - Viral\_helicase1

15608391 - PDDEXK\_1 - DUF699

33601805 - Cas\_Cas4 - Viral\_helicase1

166367568 - Cas\_Cas4 - DUF2779

284992098 - PD-(D/E)XK - ArgK

149186592 - PDDEXK\_1 - Viral\_helicase1

124514576 - PD-(D/E)XK - DUF2075

119964334 - PDDEXK\_1 - ResIII

254168017 - DUF3784 ||| Cas\_Cas4

297561136 - PDDEXK\_1 - IstB\_IS21 - Viral\_helicase1

134101555 - PDDEXK\_1 - PIF1 - Viral\_helicase1

256833664 - PDDEXK\_1 - ArgK - Viral\_helicase1

149173160 - PD-(D/E)XK - DUF699 - M16C\_assoc

15642881 - Cas\_Cas4 - DNA\_pol\_lambd\_f

14590057 - Cas\_Cas4 - DUF699

260061160 - PD-(D/E)XK - Viral\_helicase1 - Viral\_helicase1

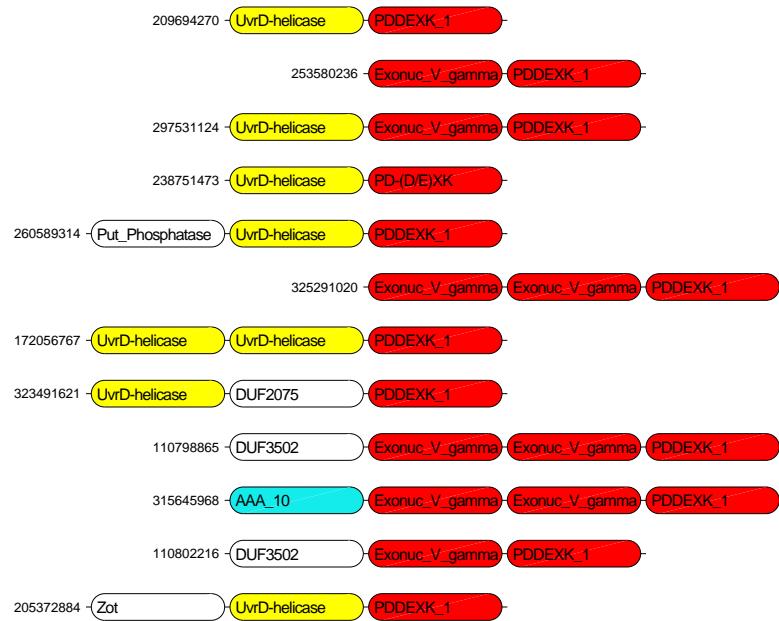

Group 64

148368938

Herpes\_alk\_exo

BIR

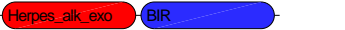



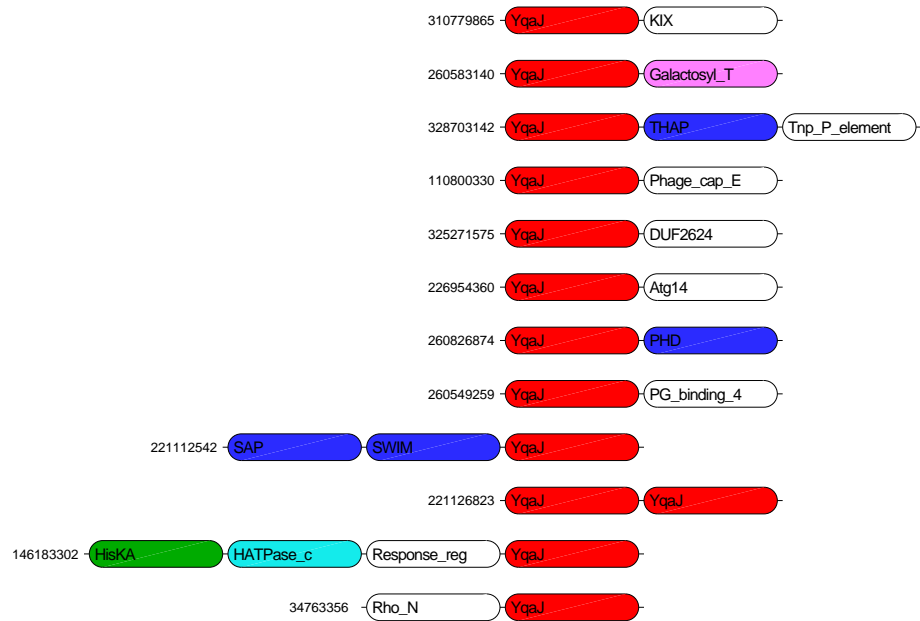

Group 66

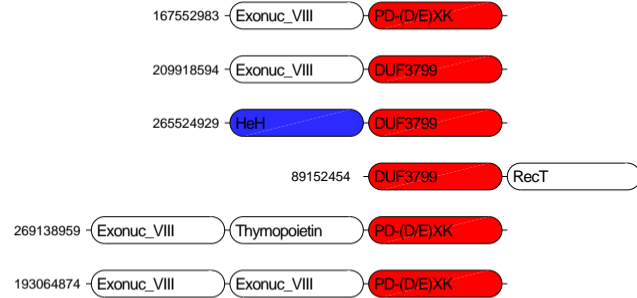

Group 67

134118319 - Morph\_protein1 - Morph\_protein1 - Morph\_protein1

159131509 - Morph\_protein1 - Morph\_protein1

154276500 - Mpv17\_PMP22 - Morph\_protein1 - Morph\_protein1

226289073 - Mpv17\_PMP22 - Morph\_protein1

242207393 - Morph\_protein1 - Morph\_protein1 - Pkinase

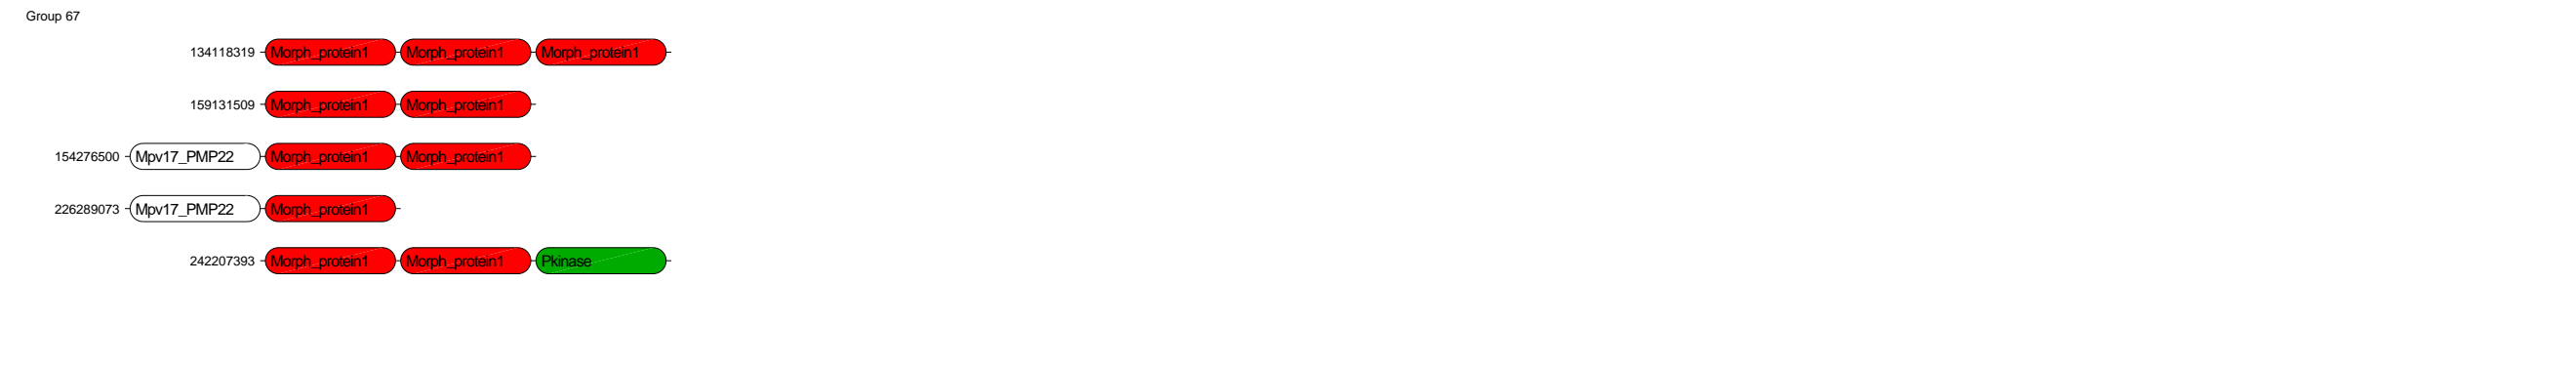

Group 68

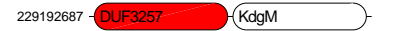

Group 71

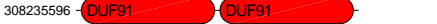

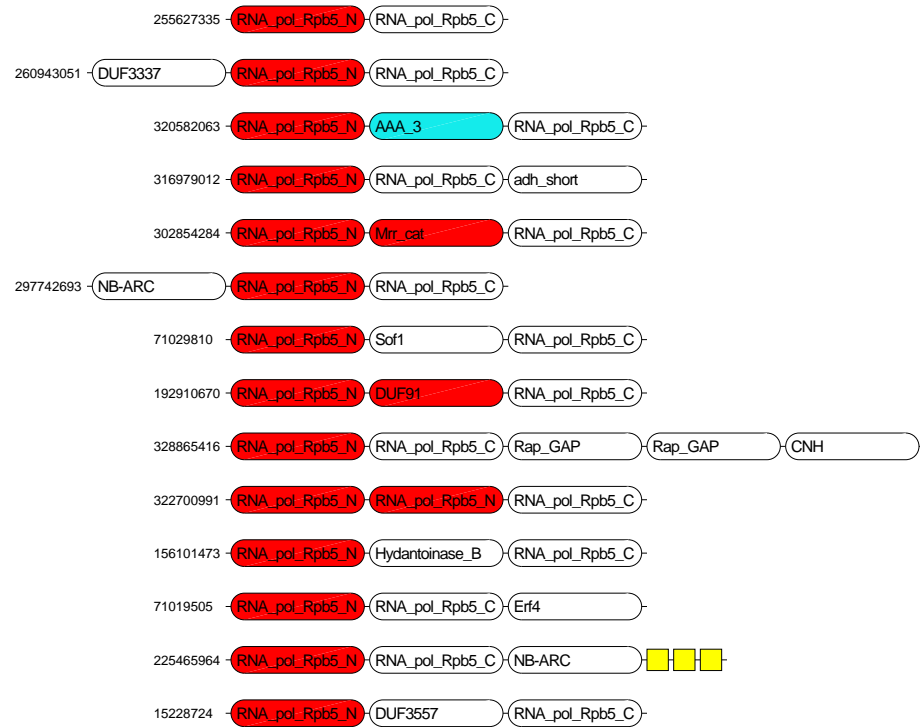

Group 72

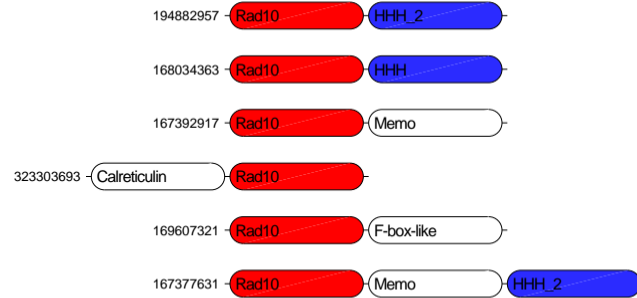

Group 73

90307977

PD-(D/E)XK

Bunya\_RdRp



Group 75

38639810

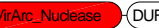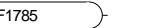

Group 76

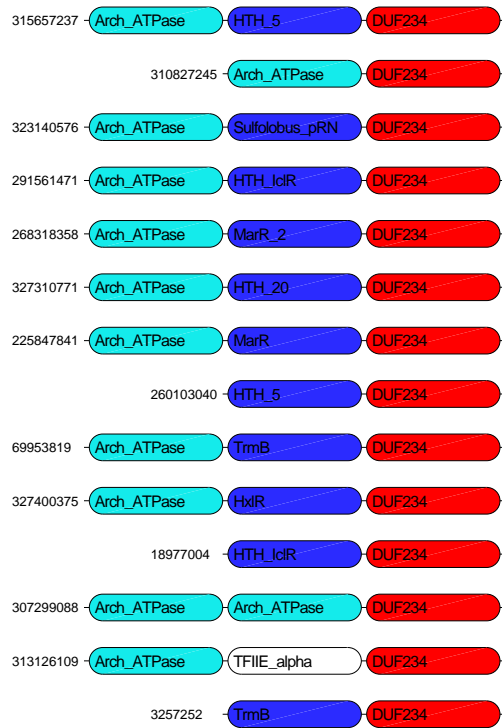

Group 77

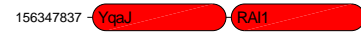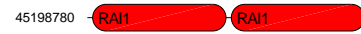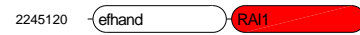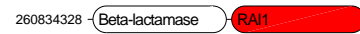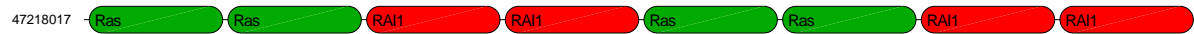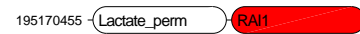

Group 78

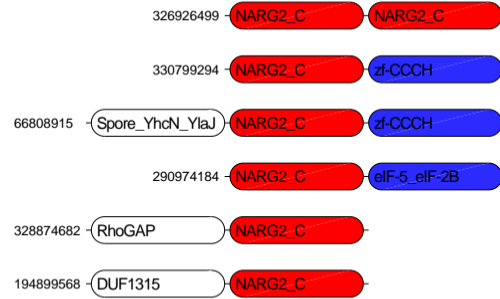

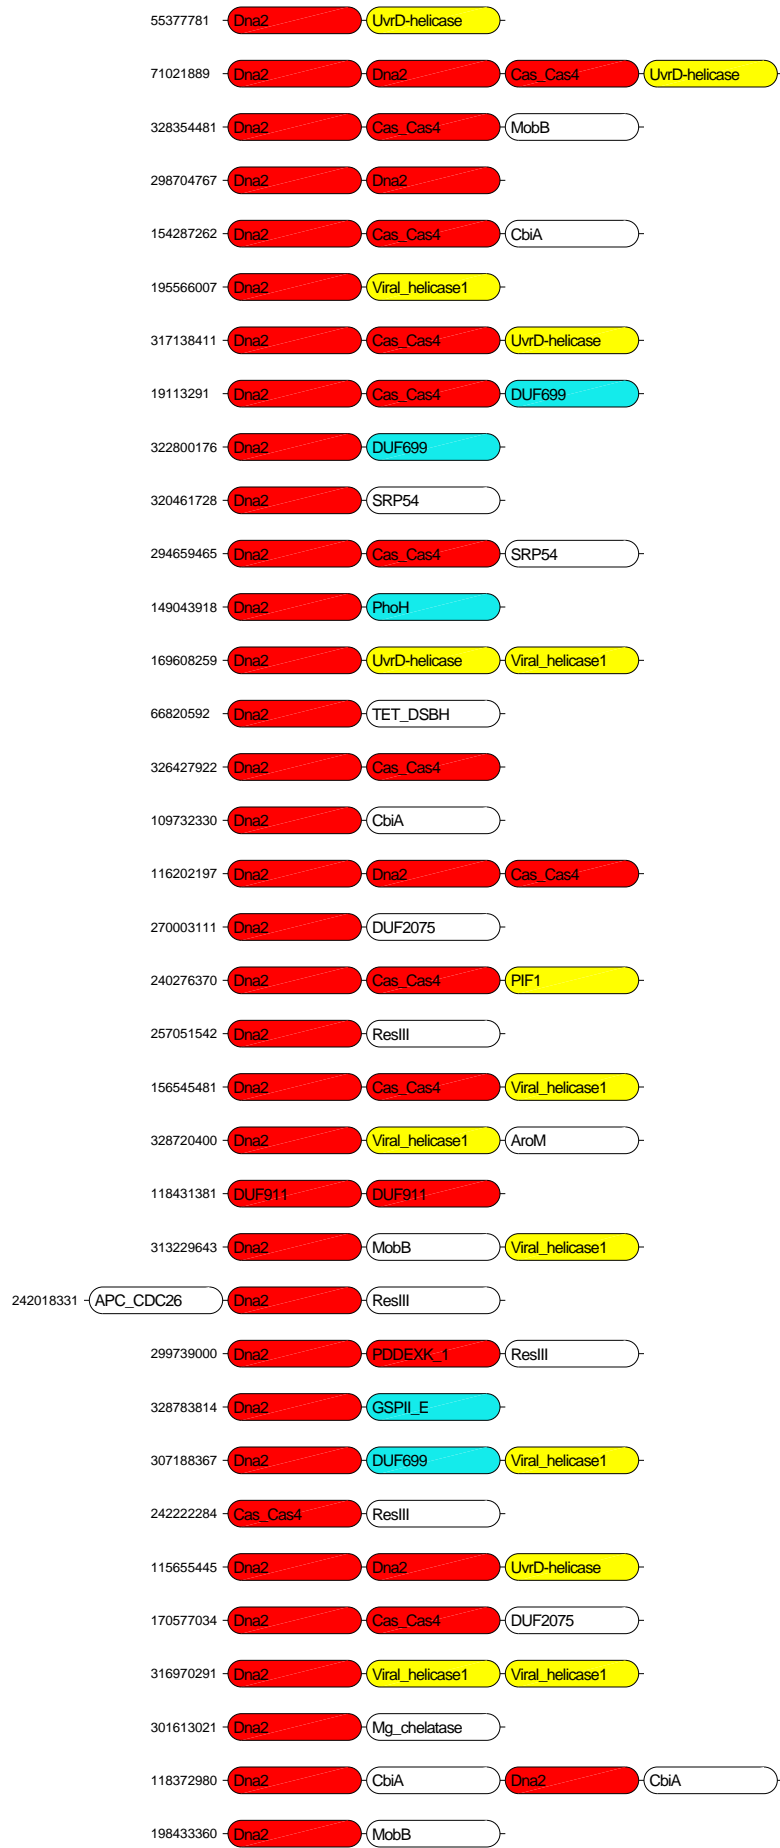

Group 80

327412699 - **Transposase\_31** - Yae1\_N

253989884 - **Transposase\_31** - DUF2802

Group 82

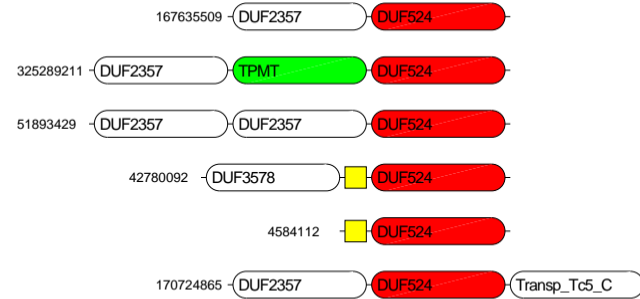

Group 83

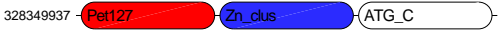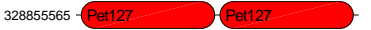



Group 84

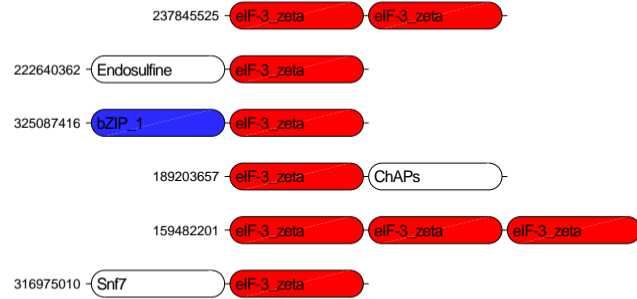

Group 85

332180348 Endonuc\_Holl

207258123 UPF0560 Endonuc\_Holl

220907465 Endonuc\_Holl

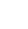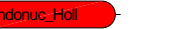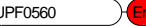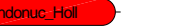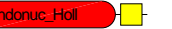

Group 86

313115743 - DUF1064 - Tn7\_Tnp\_TnsA\_N

330430971 - NUMOD3 - PD-(D/E)XK

216906008 - Dicty\_CAD - DUF1064

Group 87

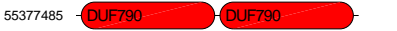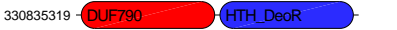

Group 88

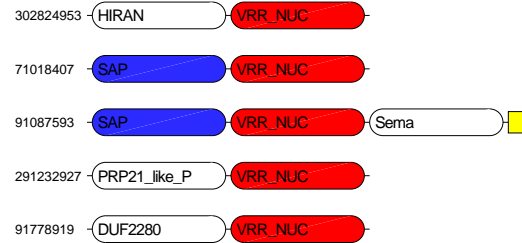

212710324  RmuC154175087  IncA  RmuC94501720  Myosin\_tail\_1  RmuC15596228   AKNA  RmuC163755375  DUF3186  RmuC238763676  DUF1043  RmuC329298141  Tropomyosin\_1  RmuC107100475  AKNA  RmuC86133626  IncA  Bacillus\_HBL  RmuC313204378  DUF1664  RmuC311281490  Prefoldin\_2  RmuC157368496 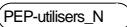 PEP-utilisers\_N  RmuC312962312   RmuC254464977  TelA  RmuC119476724  DUF1049  RmuC

Group 90

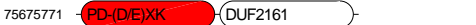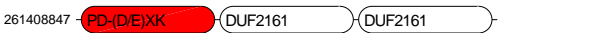

Group 91

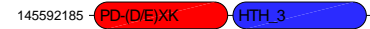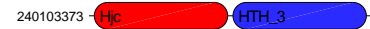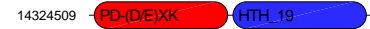



Group 93

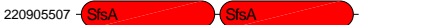

Group 94

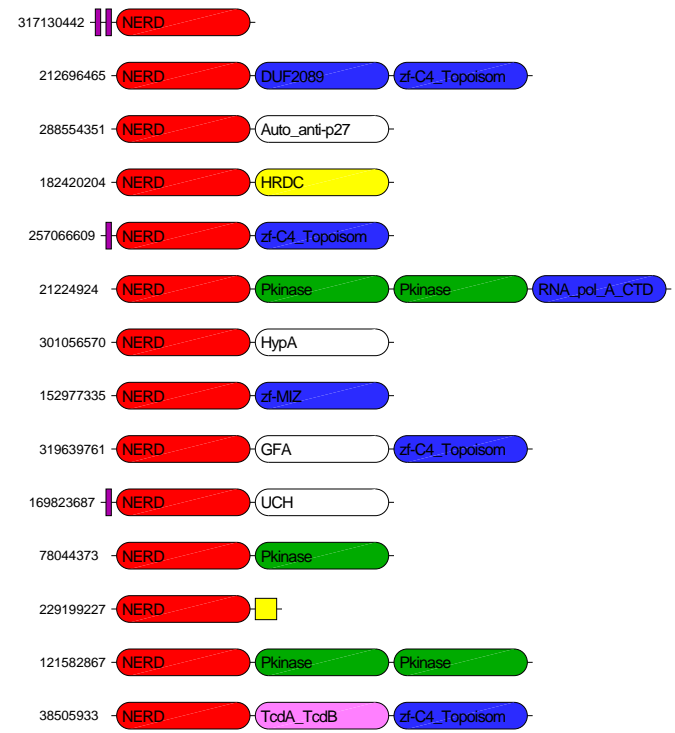

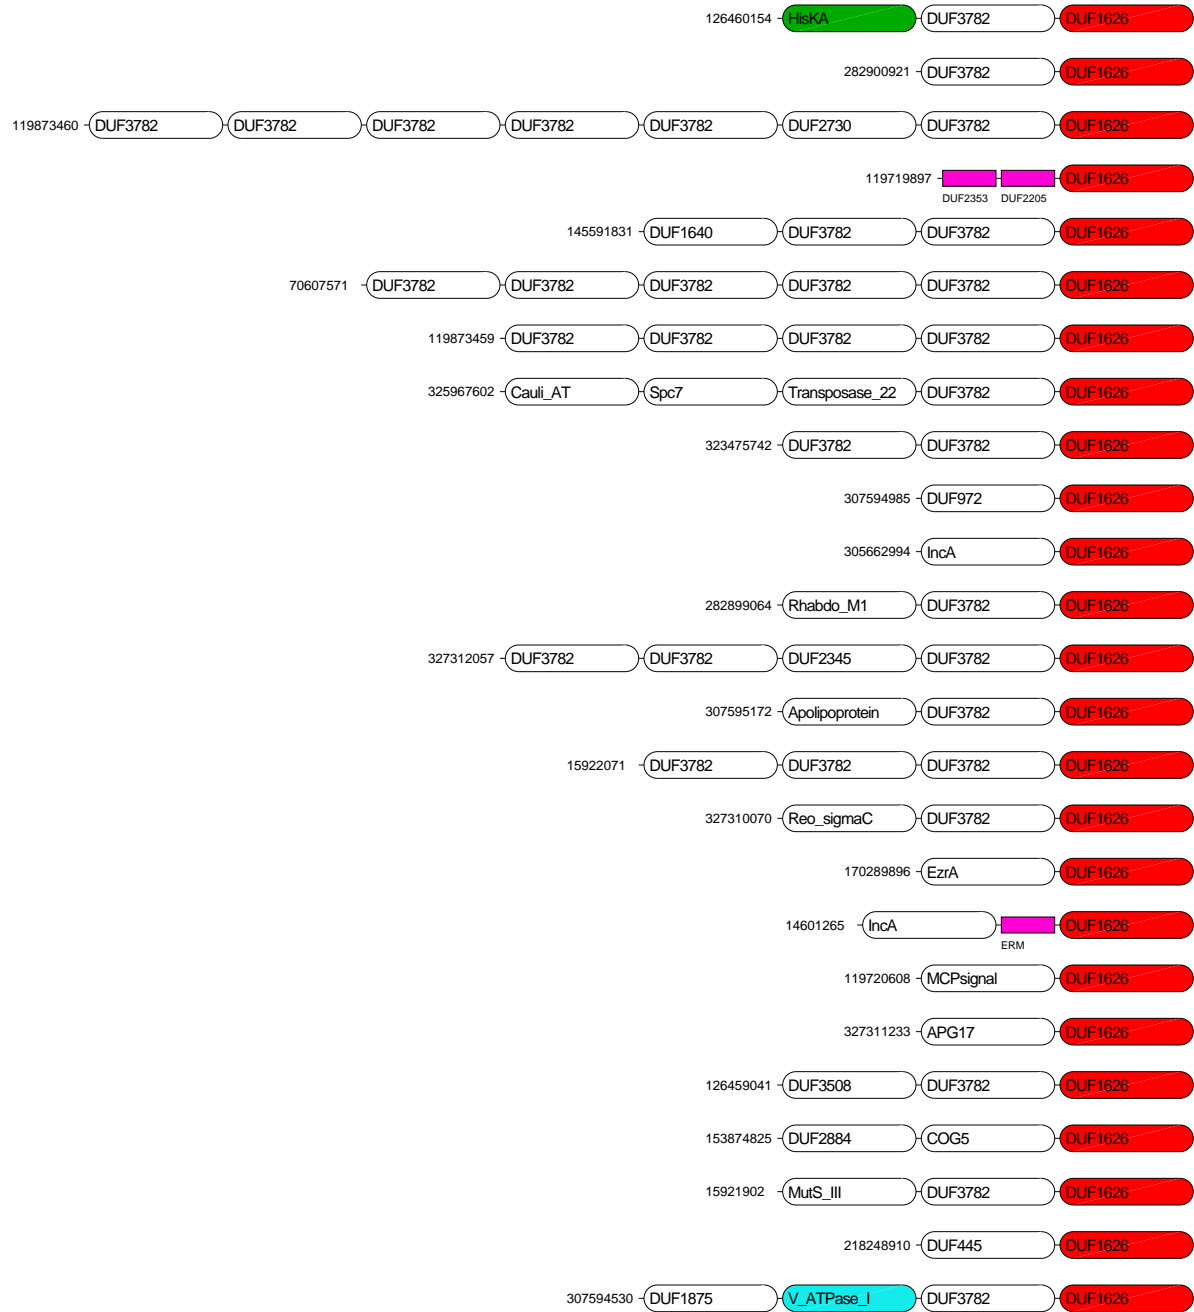

Group 96

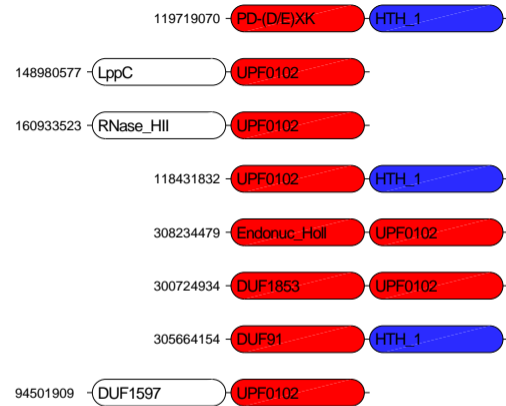

## Group 97

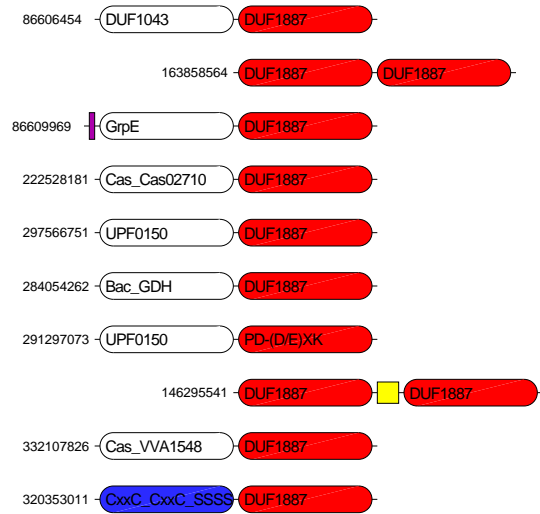

Group 98

150004014

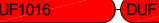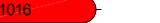

255589015

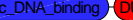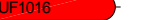

Group 99

294644187 - AAA-ATPase\_like - DUF1703



|           |                |             |            |
|-----------|----------------|-------------|------------|
| 291456986 | IslB_IS21      | PD-(D/E)XX  |            |
| 262408381 | Arch_ATPase    | NERD        |            |
| 340774202 | HTH_11         | PD-(D/E)XX  |            |
| 46255280  | HTH_IclR       | PD-(D/E)XX  |            |
| 337280939 | CPT            | PD-(D/E)XX  |            |
| 319641620 |                | PD-(D/E)XX  |            |
| 331000304 | GntR           | NERD        |            |
| 94263487  | RuvB_N         | PD-(D/E)XX  |            |
| 298253140 |                | NERD        |            |
| 225159303 | Arch_ATPase    | HTH_IclR    | PD-(D/E)XX |
| 254169052 | Arch_ATPase    | DUF2551     | PD-(D/E)XX |
| 111222751 | UPF0079        | PD-(D/E)XX  |            |
| 269216046 | CobA_CobO_BtuR | PD-(D/E)XX  |            |
| 71483575  | MarR           | PD-(D/E)XX  |            |
| 306819344 | UPF0027        | PD-(D/E)XX  |            |
| 237722584 | Miro           | PD-(D/E)XX  |            |
| 294992977 | DUF746         | PD-(D/E)XX  |            |
| 84497119  | CoaE           | PD-(D/E)XX  |            |
| 89897607  | Rad17          | PD-(D/E)XX  |            |
| 350562704 | GntR           | PD-(D/E)XX  |            |
| 297569375 | SKI            | PD-(D/E)XX  |            |
| 346314689 | HTH_11         | NERD        |            |
| 260060811 | Arch_ATPase    | HTH_20      | PD-(D/E)XX |
| 78188487  | AAA            | NERD        |            |
| 284005884 | AAA            | HTH_5       | PD-(D/E)XX |
| 241518216 | AAA_10         | PD-(D/E)XX  |            |
| 126179441 | MobB           | PD-(D/E)XX  |            |
| 222055234 | AAA            | HTH_20      | PD-(D/E)XX |
| 355575581 | GSPII_E        | PD-(D/E)XX  |            |
| 255505504 | HTH_DeoR       | PD-(D/E)XX  |            |
| 357972110 | HTH_5          | PD-(D/E)XX  |            |
| 84503326  | MarR_2         | PD-(D/E)XX  |            |
| 357040162 | Str_synth      | PD-(D/E)XX  |            |
| 223984053 | Sigma70_r4_2   | PD-(D/E)XX  |            |
| 261415699 | Arch_ATPase    | DUF1864     | PD-(D/E)XX |
| 158317994 | DUF927         | PD-(D/E)XX  |            |
| 339501487 | Arch_ATPase    | MarR_2      | PD-(D/E)XX |
| 312890453 | AAA            | DUF234      | PD-(D/E)XX |
| 298529930 | HTH_20         | PD-(D/E)XX  |            |
| 212716736 | Arch_ATPase    | UPF102      | PD-(D/E)XX |
| 303258354 | HTH_5          | NERD        |            |
| 255280990 | SRPRB          | PD-(D/E)XX  |            |
| 91785924  | MarR_2         | PD-(D/E)XX  |            |
| 325980846 | RuvB_N         | HTH_11      | PD-(D/E)XX |
| 281422827 | Arch_ATPase    | RE_SinI     | PD-(D/E)XX |
| 340347198 | DUF258         | PD-(D/E)XX  |            |
| 121605995 | RuvB_N         | MarR_2      | PD-(D/E)XX |
| 358065362 | Arch_ATPase    | HTH_5       | PD-(D/E)XX |
| 310657523 | Arch_ATPase    | PD-(D/E)XX  |            |
| 222444700 | Arch_ATPase    | FUR         | PD-(D/E)XX |
| 18312512  | AAA            | PD-(D/E)XX  |            |
| 298385866 | Bac_DnaA       | PD-(D/E)XX  |            |
| 328948835 | FUR            | PD-(D/E)XX  |            |
| 301061830 | Arch_ATPase    | PD-(D/E)XX  |            |
| 332158629 | Arch_ATPase    | HTH_WhiA    | PD-(D/E)XX |
| 317482609 | NTPase_1       | PD-(D/E)XX  |            |
| 240947913 | Arch_ATPase    | HTH_11      | PD-(D/E)XX |
| 148643855 | Arch_ATPase    | Trans_reg_C | PD-(D/E)XX |



Group 101

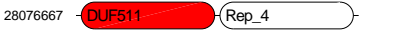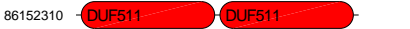

Group 102

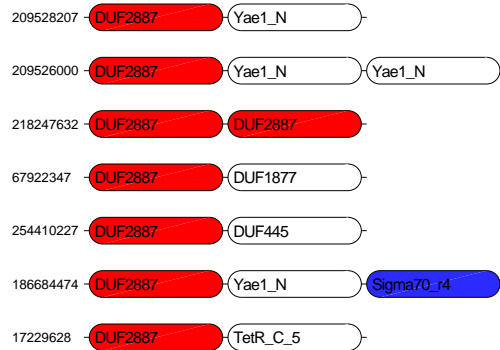

Group 104

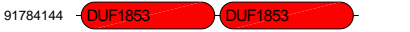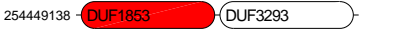

293332207 Myf5 DUF506

302815844 DUF506 MoCF\_biosynth

159488984 DNA\_ligase\_A\_N DNA\_ligase\_A\_M DUF506

302834800 DUF506 DUF506

159482504 zf-DHHC DUF506 DUF506 Glyoxal\_oxid\_N BACK

307110184 Use1 AfIR Use1 DUF506

159474936 Chlorophyllase2 DUF506

297728309 DUF3186 DUF506

Group 107

56751411 - DAO

DUF820

166032044 - HTH\_3

DUF820

261407707 - PhdYeFM

DUF820

89893666 - HTH\_17

DUF820

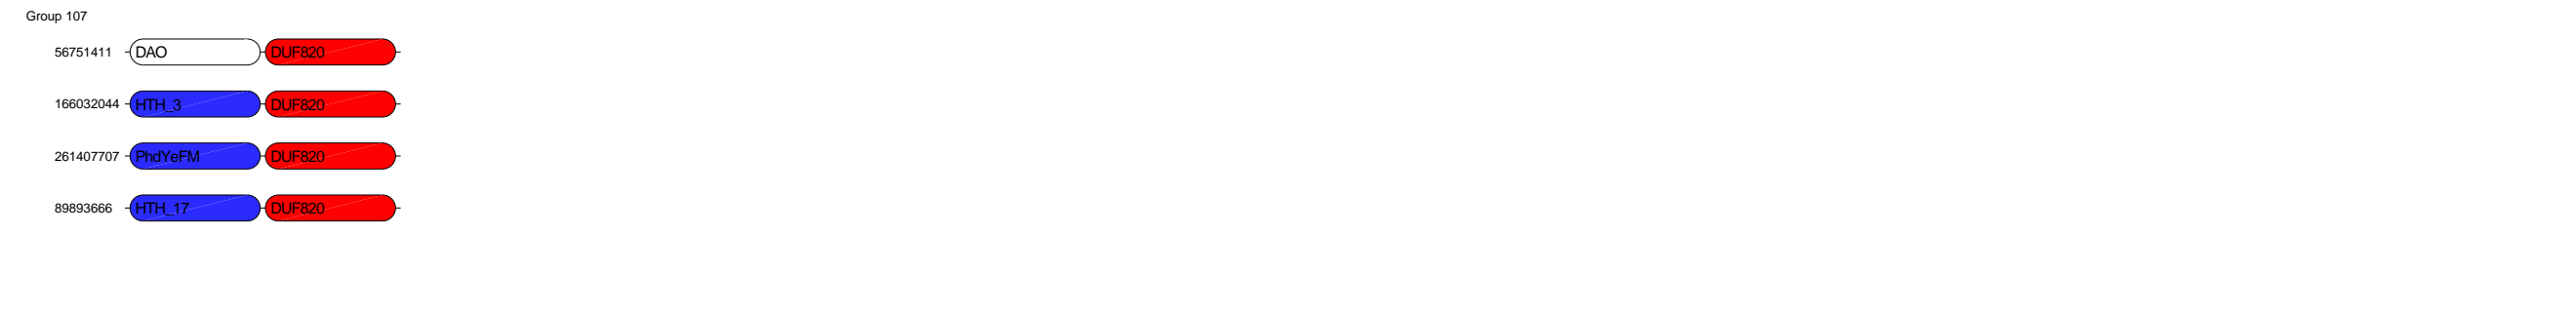

Group 109

288905366 - UPF0547 - DUF2130

262282384 - TMF\_TATA\_bd - DUF2130

313886837 - DUF3584 - DUF2130

294786547 - UPF0547 - AcylCoA\_dehyd\_C - DUF2130

255020641 - Pinin\_SDK\_memA - DUF2130

190571763 - Noelin-1 - DUF2130

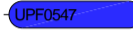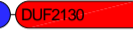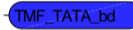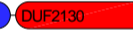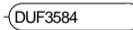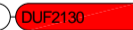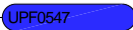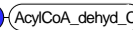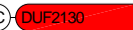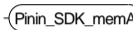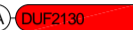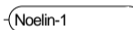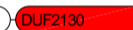

254518160 - DUF2075 - DUF2726

254507997 - DUF2726 - zf-GRF

257487181 - DUF2075 - Viral\_helicase1 - DUF2726

293375522 - DUF2726 - zf-C4\_Topoiso

237752148 - Viral\_helicase1 - DUF2726

255690839 - DUF2075 - Viral\_helicase1 - Viral\_helicase1 - DUF2726

251779078 - ResIII - DUF2726

229021089 - DUF2726 - DUF721

157412147 - DUF2726

288802689 - UvrD-helicase - Viral\_helicase1 - DUF2726

331007454 - DUF2648 - DUF2726

156974466 - DUF843 - DUF2726 - zf-C4\_Topoiso

60680653 - ResIII - Viral\_helicase1 - Viral\_helicase1 - DUF2726

281344324 - FAST\_1 - FAST\_2 - RAP

323450957 - RAP - SAP

242056075 - Pox\_Ag35 - RAP

196000781 - FAST\_1 - FAST\_1 - FAST\_2 - RAP

154250035 - IstB\_IS21 - RAP

308806908 - Ribosomal\_L31 - RAP

195996645 - FAST\_1 - RAP

119628500 - FAST\_2 - RAP

323447941 - Ins145\_P3\_rec - RYDR\_ITPR - efhand - lon\_trans - RAP - Cellulase

307105016 - RAP - Cyclin\_C

302832295 - FAST\_1 - FAST\_1 - RAP

156089331 - RAP - MMtag

307109857 - FAST\_1 - RAP - SAP

323450314 - FAST\_1 - RAP - Methyltransf\_6



Group 113

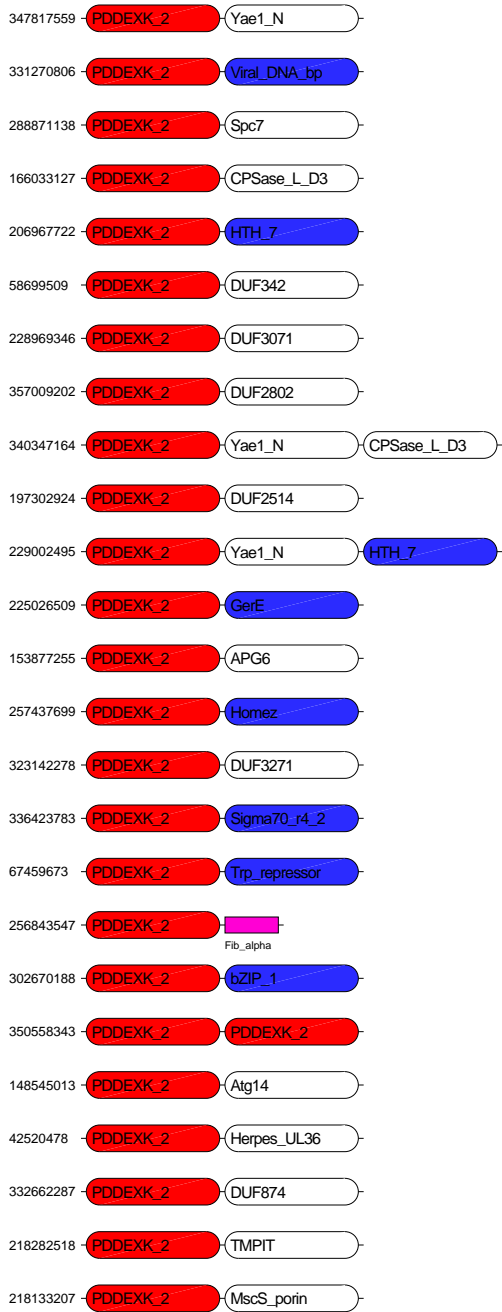

Group 114

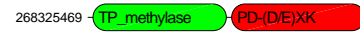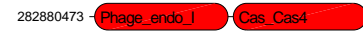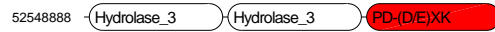

Group 115

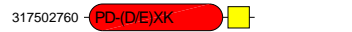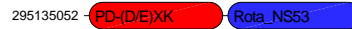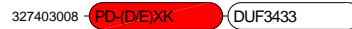

Group 116

332288284 - HATPase\_c PD-(D/E)XK

346308628 - HATPase\_c DUF91

162453759 - Response\_reg PD-(D/E)XK

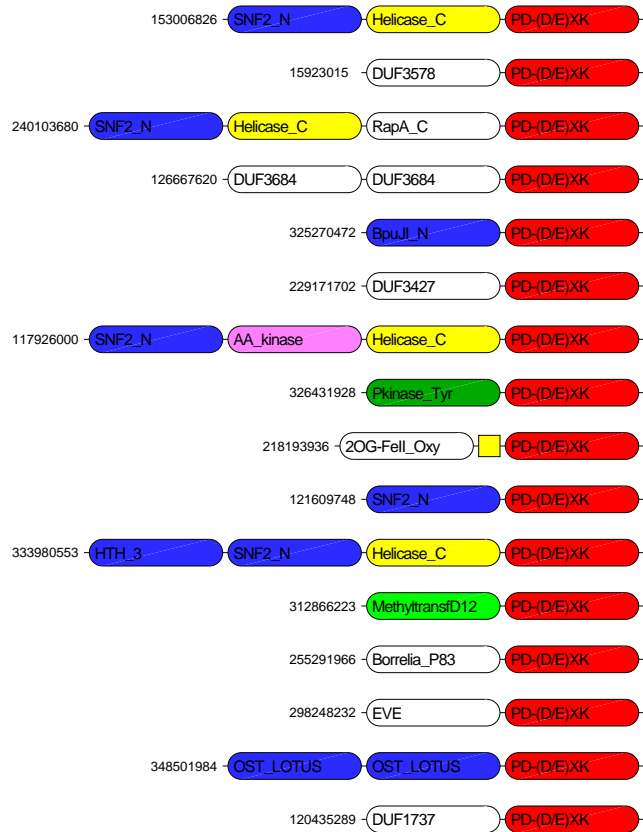

Group 119

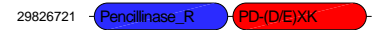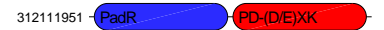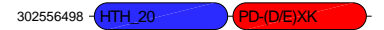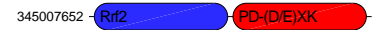

Group 121

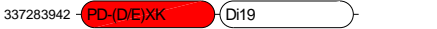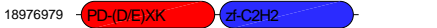

Supplement: supp_gks382_nar-00388-h-2012-File010.pdf [file supp_gks382_nar-00388-h-2012-File010.pdf]
